# Supplementary material for: Insights into the NAD+ biosynthesis pathways involved during meiotic maturation and spindle formation in porcine oocytes
Source: PubMed Central journal article supplement — J Reprod Dev. 2022 Mar 28;68(3):216–24. doi: 10.1262/jrd.2021-130 (PMC9184828; doi:10.1262/jrd.2021-130), 2022-03-28
Supplement: jrd-68-216-s001.pdf [file jrd-68-216-s001.pdf]

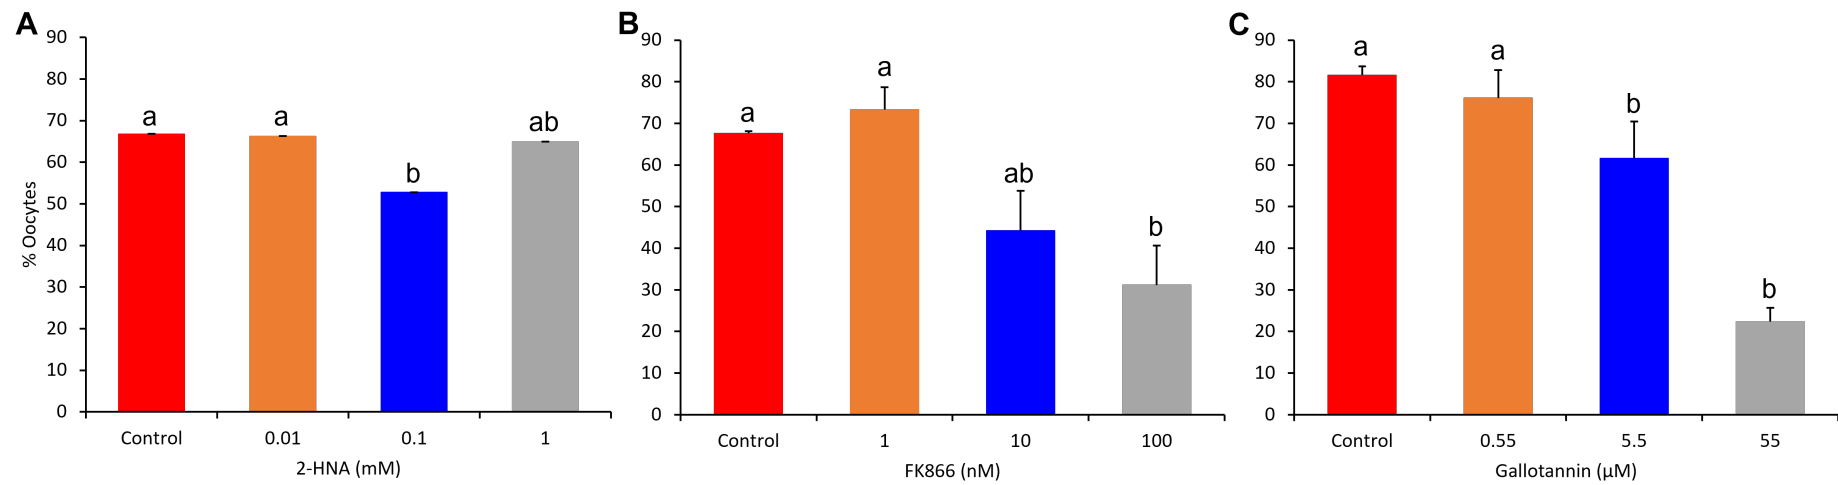

**Supplementary Fig. 1.** Dose response for A) 2-HNA, B) FK866 and C) Gallotannin, on the *in vitro* maturation of porcine oocytes. Different letters indicate statistical significance ( $P \leq 0.05$ ).

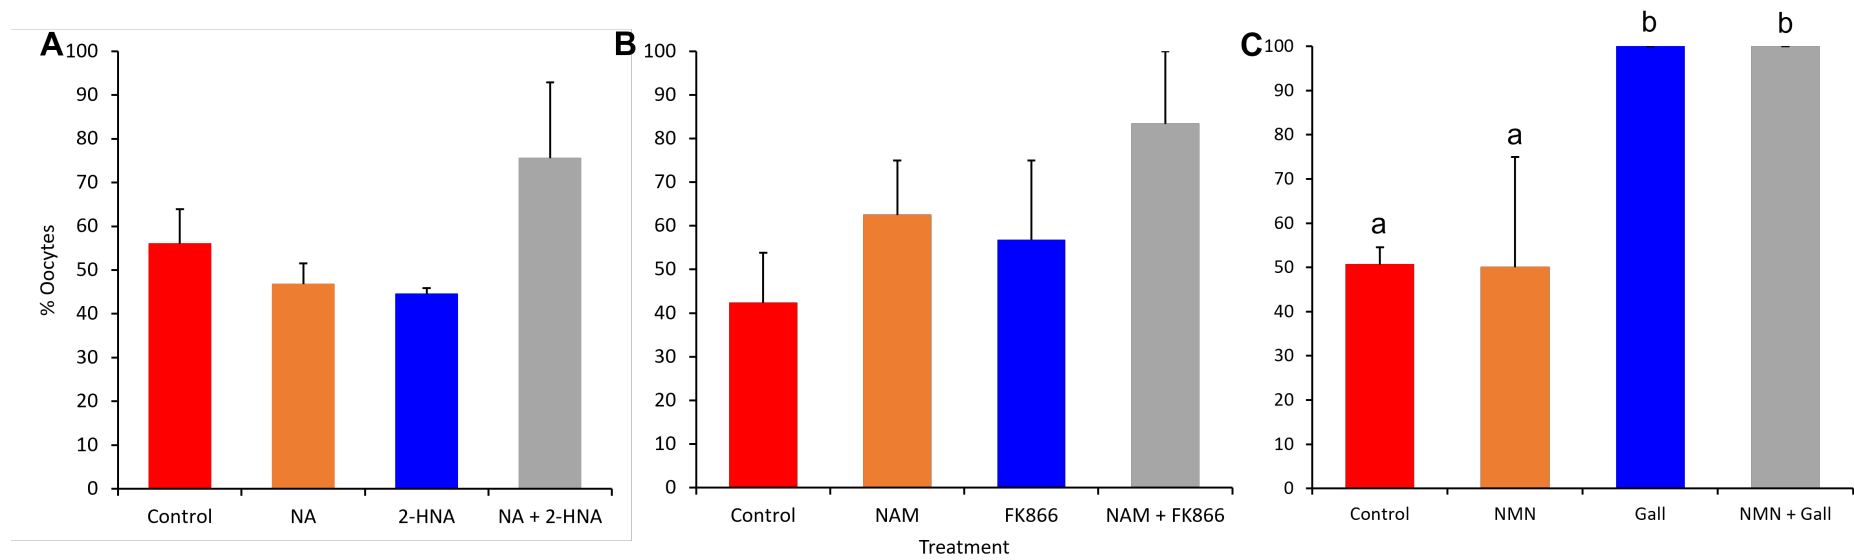

**Supplementary Fig. 2.** The proportion of oocytes with misaligned chromosomes in A) oocytes treated with NA and 2-HNA alone and in combination, B) oocytes treated with NAM and FK866 alone and in combination, and C) oocytes treated with NMN and gallotannin alone and in combination. Different letters indicate statistical significance ( $P < 0.05$ ).
